# Supplementary material for: Dietary Patterns and Insomnia Symptoms in Chinese Adults: The China Kadoorie Biobank
Source: MDPI journal article supplement (doi:10.3390/nu9030232), 2017-03-04
Supplement: s1 [file s1]

**Supplemental Table 1.** Spearman correlation coefficients comparing food intake at baseline with a repeat questionnaire within one year ( $n = 926$ ).

| Food or beverage group       | Crude | Age-, sex-adjusted |
|------------------------------|-------|--------------------|
| Rice                         | 0.75  | 0.74               |
| Wheat                        | 0.76  | 0.76               |
| Other staple foods           | 0.45  | 0.44               |
| Meat                         | 0.48  | 0.48               |
| Poultry                      | 0.48  | 0.48               |
| Fish                         | 0.60  | 0.60               |
| Eggs                         | 0.58  | 0.58               |
| Fresh vegetables             | 0.17  | 0.16               |
| Soybean                      | 0.35  | 0.35               |
| Preserved vegetables         | 0.54  | 0.54               |
| Fresh fruit                  | 0.55  | 0.54               |
| Dairy products               | 0.66  | 0.66               |
| Beer                         | 0.31  | 0.27               |
| Rice wine                    | 0.43  | 0.42               |
| Wine                         | 0.40  | 0.40               |
| Heavy spirit ( $\geq 40\%$ ) | 0.64  | 0.60               |
| Light spirit ( $< 40\%$ )    | 0.40  | 0.38               |
| Green tea                    | 0.71  | 0.69               |
| Oolong tea                   | 0.72  | 0.71               |
| Black tea                    | 0.63  | 0.63               |
| Other tea <sup>1</sup>       | -     | -                  |

<sup>1</sup> Data is singular and kappa = 1.

**Supplemental Table 2.** Characteristics of dietary patterns by quartile categories.

| Food or beverage group        | Traditional northern dietary pattern |     |     |      | Modern dietary pattern |     |     |      | Overall Mean (Standard deviation) |
|-------------------------------|--------------------------------------|-----|-----|------|------------------------|-----|-----|------|-----------------------------------|
|                               | Q1                                   | Q2  | Q3  | Q4   | Q1                     | Q2  | Q3  | Q4   |                                   |
| <b>Food group, day/week</b>   |                                      |     |     |      |                        |     |     |      |                                   |
| Rice                          | 7.0                                  | 7.0 | 5.8 | 1.6  | 4.0                    | 5.5 | 6.1 | 5.7  | 5.3 (2.6)                         |
| Wheat                         | 0.9                                  | 1.6 | 5.2 | 7.0  | 4.0                    | 3.0 | 3.2 | 4.5  | 3.7 (2.9)                         |
| Other staple                  | 0.3                                  | 0.5 | 0.9 | 4.0  | 2.4                    | 1.3 | 0.8 | 1.1  | 1.4 (2.3)                         |
| Meat                          | 4.6                                  | 3.8 | 4.5 | 2.0  | 1.5                    | 3.1 | 4.6 | 5.7  | 3.7 (2.5)                         |
| Poultry                       | 2.0                                  | 1.4 | 1.6 | 0.4  | 0.2                    | 1.0 | 1.8 | 2.4  | 1.4 (1.6)                         |
| Fish                          | 2.0                                  | 1.4 | 1.6 | 0.4  | 0.2                    | 1.0 | 1.8 | 2.4  | 1.4 (1.6)                         |
| Eggs                          | 1.3                                  | 2.2 | 3.3 | 3.2  | 1.1                    | 2.3 | 2.6 | 4.0  | 2.5 (2.2)                         |
| Fresh vegetables              | 6.9                                  | 6.9 | 6.9 | 6.7  | 6.6                    | 6.9 | 6.9 | 7.0  | 6.8 (0.8)                         |
| Soybean                       | 1.8                                  | 1.7 | 2.1 | 1.2  | 0.7                    | 1.5 | 2.0 | 2.6  | 1.7 (1.6)                         |
| Preserved vegetables          | 2.7                                  | 2.0 | 2.4 | 1.6  | 1.7                    | 2.1 | 2.3 | 2.5  | 2.2 (2.4)                         |
| Fresh fruit                   | 1.9                                  | 2.5 | 3.7 | 2.1  | 0.8                    | 1.5 | 2.7 | 5.2  | 2.6 (2.5)                         |
| Dairy products                | 0.1                                  | 0.5 | 1.9 | 1.3  | <0.1                   | 0.2 | 0.6 | 3.0  | 1.0 (2.1)                         |
| <b>Beverage group, g/week</b> |                                      |     |     |      |                        |     |     |      |                                   |
| Beer                          | 1.0                                  | 2.0 | 8.3 | 5.3  | 0.1                    | 0.7 | 2.5 | 13.2 | 4.1 (34.0)                        |
| Rice wine                     | 12.2                                 | 1.1 | 0.4 | <0.1 | 1.6                    | 4.4 | 5.1 | 2.6  | 3.4 (35.1)                        |

|                     |      |      |      |      |      |      |      |      |              |
|---------------------|------|------|------|------|------|------|------|------|--------------|
| Wine                | 0.1  | 0.1  | 0.2  | 0.1  | <0.1 | <0.1 | 0.1  | 0.4  | 0.1 (3.8)    |
| Heavy spirit (≥40%) | 37.5 | 23.6 | 23.9 | 11.8 | 21.8 | 26.6 | 26.0 | 22.3 | 24.2 (112.6) |
| Light spirit (<40%) | 37.5 | 23.6 | 23.9 | 11.8 | 21.8 | 26.6 | 26.0 | 22.3 | 24.2 (112.6) |
| Green tea           | 4.9  | 6.7  | 9.0  | 5.6  | 2.6  | 5.2  | 7.3  | 11.1 | 6.6 (16.0)   |
| Oolong tea          | 0.9  | 0.4  | 0.2  | <0.1 | <0.1 | 0.2  | 0.5  | 0.8  | 0.4 (4.5)    |
| Black tea           | 3.6  | 0.4  | 0.1  | <0.1 | 1.2  | 1.5  | 1.0  | 0.5  | 1.0 (7.6)    |
| Other tea           | <0.1 | <0.1 | <0.1 | <0.1 | <0.1 | <0.1 | <0.1 | <0.1 | 0.0 (0.7)    |

**Supplemental Table 3.** Comparing dietary patterns constructed from food consumption frequency and estimated amount. <sup>1</sup>

Traditional northern dietary pattern <sup>2</sup>

|                            |    | Estimated food consumption amount |                  |                  |                   | Total   | kappa | Weighted kappa |
|----------------------------|----|-----------------------------------|------------------|------------------|-------------------|---------|-------|----------------|
|                            |    | Q4                                | Q3               | Q2               | Q1                |         |       |                |
| Food consumption frequency | Q1 | 91,445<br>(19.0)                  | 28,381<br>(5.9)  | 528<br>(0.1)     | 0<br>(0.0)        | 120,354 | 0.675 | 0.800          |
|                            | Q2 | 25,949<br>(5.4)                   | 72,914<br>(15.2) | 21,495<br>(4.5)  | 0<br>(0.0)        | 120,358 |       |                |
|                            | Q3 | 2962<br>(0.6)                     | 19,054<br>(4.0)  | 88,932<br>(18.5) | 9409<br>(2.0)     | 120,357 |       |                |
|                            | Q4 | 0<br>(0.0)                        | 2<br>(<0.1)      | 9406<br>(2.0)    | 110,947<br>(23.1) | 120,355 |       |                |
| Total                      |    | 120,356                           | 120,351          | 120,361          | 120,356           | 481,424 |       |                |

Modern dietary pattern

|                            |    | Estimated food consumption amount |                  |                  |                   | Total   | kappa | Weighted kappa |
|----------------------------|----|-----------------------------------|------------------|------------------|-------------------|---------|-------|----------------|
|                            |    | Q1                                | Q2               | Q3               | Q4                |         |       |                |
| Food consumption frequency | Q1 | 94,180<br>(19.6)                  | 25,979<br>(5.4)  | 197<br>(<0.1)    | 0<br>(0.0)        | 120,356 | 0.618 | 0.769          |
|                            | Q2 | 25,464<br>(5.3)                   | 68,247<br>(14.2) | 26,579<br>(5.5)  | 65<br>(<0.1)      | 120,355 |       |                |
|                            | Q3 | 710<br>(0.2)                      | 25,929<br>(5.4)  | 77,232<br>(16.0) | 16,486<br>(3.4)   | 120,357 |       |                |
|                            | Q4 | 2<br>(<0.1)                       | 201<br>(<0.1)    | 16,348<br>(3.4)  | 103,805<br>(21.6) | 120,356 |       |                |
| Total                      |    | 120,356                           | 120,356          | 120,356          | 120,356           | 481,424 |       |                |

<sup>1</sup> Data in the table are shown as frequencies and overall percentage. <sup>2</sup> The quartile of a traditional northern dietary pattern of estimated amount were reversed to match the same direction of the food groups.

**Supplemental Table 4.** Odds ratios and 95% confidence intervals of sleep problems by quartile of dietary pattern score with additional adjustment of daily energy intake.

|                                             |  | Quartile of dietary pattern scores |                  |                  |                  | p for trend |
|---------------------------------------------|--|------------------------------------|------------------|------------------|------------------|-------------|
|                                             |  | Q1                                 | Q2               | Q3               | Q4               |             |
| <b>Traditional northern dietary pattern</b> |  |                                    |                  |                  |                  |             |
| Difficulty initiating/maintaining sleep     |  | 1.00 (Reference)                   | 0.99 (0.96–1.02) | 1.02 (0.98–1.05) | 0.83 (0.79–0.88) | <0.0001     |
| Early morning awakening                     |  | 1.00 (Reference)                   | 0.96 (0.93–0.99) | 1.03 (0.99–1.07) | 0.86 (0.81–0.91) | 0.0003      |
| Daytime dysfunction                         |  | 1.00 (Reference)                   | 1.00 (0.93–1.06) | 0.98 (0.90–1.07) | 0.80 (0.70–0.91) | 0.0007      |
| <b>Modern dietary pattern</b>               |  |                                    |                  |                  |                  |             |
| Difficulty initiating/maintaining sleep     |  | 1.00 (Reference)                   | 0.92 (0.89–0.94) | 0.89 (0.85–0.92) | 0.89 (0.85–0.94) | <0.0001     |

|                         |                  |                  |                  |                  |         |
|-------------------------|------------------|------------------|------------------|------------------|---------|
| Early morning awakening | 1.00 (Reference) | 0.94 (0.92–0.97) | 0.89 (0.86–0.93) | 0.82 (0.78–0.87) | <0.0001 |
| Daytime dysfunction     | 1.00 (Reference) | 0.99 (0.93–1.05) | 0.99 (0.92–1.07) | 0.91 (0.81–1.01) | 0.0848  |

Odds ratios and 95% confidence intervals are adjusted for study site, age (year), gender, BMI (kg/m<sup>2</sup>), married (yes or no), manual work (yes or no), education attainment (no formal school, primary school, middle school, high school, or college/university), household income (<10,000, 10,000–19,999, ≥ 20,000 CNY/year), physical activity (<13.0, 13.0 to 26.0, >26.1 MET-h/day), smoking status (never/occasional, former, current and 1 to 14 cigarettes/day, current and 15 to 24 cigarettes/day, or current and ≥25 cigarettes/day), alcohol consumption (not weekly drinking, ex-regular drinkers, not daily, daily and <15 g/day, daily and 15–29 g/day, daily and 30–59 g/day, or daily and ≥60 g/day), hypertension (yes or no), diabetes (yes or no), depressive symptom (yes or no), anxiety symptom (yes or no), and log-transformed total energy intake (kcal/day).

**Supplemental Table 5.** Odds ratios and 95% confidence intervals of sleep problems by quartile of dietary pattern score among participants without mental symptoms or somatic diseases (*n* = 412,830).

|                                             | Quartile of dietary pattern scores |                  |                  |                  | <i>p</i> for trend |
|---------------------------------------------|------------------------------------|------------------|------------------|------------------|--------------------|
|                                             | Q1                                 | Q2               | Q3               | Q4               |                    |
| <b>Traditional northern dietary pattern</b> |                                    |                  |                  |                  |                    |
| Difficulty initiating/maintaining sleep     | 1.00 (Reference)                   | 0.98 (0.95–1.01) | 0.99 (0.95–1.03) | 0.79 (0.74–0.84) | <0.0001            |
| Early morning awakening                     | 1.00 (Reference)                   | 0.95 (0.92–0.98) | 1.04 (1.00–1.08) | 0.85 (0.80–0.91) | 0.0039             |
| Daytime dysfunction                         | 1.00 (Reference)                   | 0.97 (0.90–1.05) | 0.98 (0.89–1.08) | 0.84 (0.73–0.97) | 0.0306             |
| <b>Modern dietary pattern</b>               |                                    |                  |                  |                  |                    |
| Difficulty initiating/maintaining sleep     | 1.00 (Reference)                   | 0.92 (0.90–0.95) | 0.90 (0.87–0.93) | 0.91 (0.87–0.94) | <0.0001            |
| Early morning awakening                     | 1.00 (Reference)                   | 0.99 (0.96–1.02) | 0.97 (0.93–1.00) | 0.95 (0.91–0.99) | 0.0081             |
| Daytime dysfunction                         | 1.00 (Reference)                   | 1.03 (0.97–1.11) | 1.07 (0.98–1.15) | 1.03 (0.94–1.14) | 0.4593             |

Odds ratios and 95% confidence intervals are adjusted for site, age (year), gender, BMI (kg/m<sup>2</sup>), married (yes or no), manual work (yes or no), education attainment (no formal school, primary school, middle school, high school, or college/university), household income (<10,000, 10,000–19,999, ≥ 20,000 CNY/year), physical activity (<13.0, 13.0 to 26.0, >26.1 MET-h/day), smoking status (never/occasional, former, current and 1 to 14 cigarettes/day, current and 15 to 24 cigarettes/day, or current and ≥25 cigarettes/day), and alcohol consumption (not weekly drinking, ex-regular drinkers, not daily, daily and <15 g/day, daily and 15–29 g/day, daily and 30–59 g/day, or daily and ≥60 g/day).
